# Supplementary material for: ATP Recognition and sensing with a phenanthroline-containing polyammonium receptor
Source: Royal Society of Chemistry journal article supplement (doi:10.1039/b611031b), 2006-01-01
Supplement: b611031b.pdf [file b611031b.pdf]

## Electronic supplementary information

### Ligand synthesis

**The procedure for the synthesis of ligand L is depicted in Scheme S1.** 2,9-bis(bromomethyl)-1,10-phenanthroline **E** was prepared as previously described. (Chandler, C.J.; Deady L.W., Reiss J. A.. J. Heterocycl. Chem. 1981, 18, 599.)

### 1,21-Phthalimido-5,9,13,17-tetrakis(*p*-tolylsulfonyl)-1,5,9,13,17,21-hexaazahenicosane (**B**)

Tosylated amine 1,4,8,12-tetrakisyl-1,4,8,12-tetrazadodecane **A** (10.06 g, 12.5 mmol), K<sub>2</sub>CO<sub>3</sub> (13.82 g, 0.1 mol) and *N*-(3-bromopropyl)phthalimide (13.40 g, 50 mmol) were suspended in refluxing CH<sub>3</sub>CN (300 cm<sup>3</sup>). After refluxing for 12 h, the suspension was filtered off. The solution was vacuum evaporated to dryness and the crude product was chromatographed on neutral alumina ligroin-ethyl acetate 1:1 mixture. The eluted fractions were collected and evaporated to dryness to afford **B** as yellowish oil. Yield: 14.44 g, 98%; Anal. Calcd. for C<sub>59</sub>H<sub>66</sub>N<sub>6</sub>S<sub>4</sub>O<sub>12</sub>: C, 60.1; H, 5.64; N, 7.13. Found C, 60.2; H, 5.7; N, 7.2. <sup>1</sup>H-NMR (CDCl<sub>3</sub>, 300 MHz) δ 7.82 (m, 4H), 7.66 (m, 12H), 7.28 (t, 8H), 3.68 (t, 4H), 3.13 (m, 16H), 2.42 (s, 6H), 2.40 (s, 6H), 1.89 (m, 10H). <sup>13</sup>C-NMR (CDCl<sub>3</sub>, 75 MHz) δ 167.9, 143.2, 135.9, 133.8, 134.0, 131.8, 129.6, 129.4, 127.0, 127.3, 123.0, 122.8, 46.3, 46.6, 46.8, 46.2, 46.5, 46.7, 35.5, 35.2, 34.9, 27.7, 27.5, 27.2, 21.4, 21.2, 20.9, 20.7.

### 5,9,13,17-Tetrakis(*p*-tolylsulfonyl)-1,5,9,13,17,21-hexaazahenicosane (**C**)

A mixture of compound **B** (14.44 g, 12.2 mmol) and hydrazine monohydrate 85% (30 mL, 0.69 mol) in THF (500 mL) was refluxed for 12 h. Then the mixture was cooled, filtered off and the solution was vacuum evaporated to dryness to give a yellowish oil. The oil was dissolved in 100 mL of CHCl<sub>3</sub> and the solution was dried with anhydrous Na<sub>2</sub>SO<sub>4</sub>. Then, it was vacuum evaporated to dryness to obtain product **C**. Yield: 11.1 g, 99%. Anal. Calcd for C<sub>43</sub>H<sub>62</sub>N<sub>6</sub>S<sub>4</sub>O<sub>8</sub> C, 55.77; H, 6.08; N, 6.85. Found C, 55.8; H, 6.1; N, 6.9. <sup>1</sup>H-NMR (CDCl<sub>3</sub>, 300 MHz) δ 7.66 (d, 8H), 7.30 (m, 8H), 3.14 (m, 16H), 2.70 (t, 4H), 2.42 (s, 12H), 1.90 (m, 6H), 1.64 (m, 4H).

### **1,5,9,13,17,21-Hexakis(*p*-tolylsulfonyl)-1,5,9,13,17,21-hexaazahenicosane (D)**

A solution of **C** (10.91g, 12 mmol) in 50 mL of pyridine was added in four hours under vigorous stirring to a solution of *p*-tolylsulfonyl chloride (6.62 g, 35 mmol) dissolved in 50 ml of pyridine; the reaction temperature was kept at 10 °C. The reaction mixture was then kept under stirring at room temperature overnight. The solution was then added to a vigorously stirred mixture of water and ice. The product obtained was filtered off, washed with water and ethanol, recrystallized from a chloroform-ethanol mixture and dried in vacuo at 40 °C. Yield: 12.1 g (82%). Anal. Calcd for C<sub>57</sub>H<sub>74</sub>N<sub>6</sub>S<sub>6</sub>O<sub>12</sub> C, 55.77; H, 6.08; N, 6.85. Found C, 55.8; H, 6.1; N, 6.9 <sup>1</sup>H-NMR (CDCl<sub>3</sub>, 300 MHz) δ 7.68 (m, 12H), 7.30 (m, 12H), 3.13 (m, 16H), 2.98 (t, 4H), 2.42 (m, 18H), 1.85 (m, 10H). <sup>13</sup>C-NMR (CDCl<sub>3</sub>, 75 MHz) δ 143.5, 136.8, 129.8, 129.6, 127.1, 127.0, 47.5, 47.0, 46.7, 40.2, 40.3, 40.5, 29.4, 29.2, 29.0, 21.5, 21.2, 21.0, 19.8.

### **2,6,10,14,18,22-hexa(*p*-tolylsulfonyl)-2,6,10,14,18,22-hexaaza [23]-24,37-phenanthrolinephane. (F)**

A sample of **D** (8.0 g, 6.5 mmol) and K<sub>2</sub>CO<sub>3</sub> (9.02 g, 65 mmol) were suspended in refluxing CH<sub>3</sub>CN (300 mL). To this mixture, a solution of 2,9-bis(bromomethyl)-1,10-phenanthroline **E** (2.38 g, 6.5 mmol) in CH<sub>3</sub>CN (500 mL) was added dropwise in 4 h. After the addition was completed, the suspension was refluxed for 2 h and then filtered. The solution was vacuum evaporated to yield the crude product which was chromatographed on neutral alumina by using ligroin-ethyl acetate 1:1.5 as eluent. The eluted fractions were collected and evaporated to dryness to afford compound **F** as a colorless solid (2.78 g, 30%). Anal. Calcd for C<sub>71</sub>H<sub>82</sub>N<sub>8</sub>S<sub>6</sub>O<sub>12</sub> C, 59.56; H, 5.77; N, 7.83. Found C, 59.4; H, 5.9; N, 7.8. <sup>1</sup>H-NMR (CDCl<sub>3</sub>, 300 MHz) δ 8.30 (d, 2H), 7.96 (d, 2H), 7.80 (s, 2H), 7.71 (d, 4H), 7.53 (m, 8H), 7.26 (m, 12H), 4.76 (s, 4H), 3.25 (t, 4H), 2.97 (t, 4H), 2.76 (m, 12H), 2.38 (s, 18H), 1.64 (m, 6H), 1.30 (m, 4H). <sup>13</sup>C-NMR (CDCl<sub>3</sub>, 75 MHz) δ 157.9, 143.4, 143.2, 143.1, 137.2, 135.6, 135.6, 129.7, 129.6, 128.0, 127.1, 127.0, 77.2, 55.6, 48.0, 46.9, 46.6, 46.4, 46.2, 28.5, 28.3, 28.2, 21.5.

### **2,6,10,14,18,22-hexaaza [23]-24,37-phenanthrolinephane Hexahydrobromide (L· 6HBr).**

Hexatosylated macrocycle **F** (2.78 g, 1.94 mmol) and phenol (32.70 g, 0.35 mol) were dissolved in HBr/AcOH (33%, 270 mL). The solution was stirred at 90 °C for 22 h. The resulting suspension was filtered, and the solid was washed with CH<sub>2</sub>Cl<sub>2</sub> for several times. The yellowish solid was recrystallized from a water/ethanol mixture to give **L** as hexahydrobromide salt (1.31 g, 68%). Anal. Calcd for C<sub>29</sub>H<sub>52</sub>N<sub>8</sub>Br<sub>6</sub> C, 35.11; H, 5.28; N, 11.29. Found C, 35.1; H, 5.2; N, 11.2. <sup>1</sup>H-NMR (D<sub>2</sub>O, 300 MHz) δ 8.50 (d, 2H), 7.92 (s, 2H), 7.84 (d, 2H), 4.72 (s, 4H), 3.50 (t, 4H), 3.36-3.27 (m, 16H), 2.40-2.32 (m, 4H), 2.27-2.20 (m, 6H). <sup>13</sup>C-NMR (D<sub>2</sub>O, 75 MHz) δ 151.1, 144.2, 139.2, 129.1, 127.3, 123.3, 52.3, 45.2, 44.8, 44.7, 44.1, 44.0, 23.0, 22.5, 21.8. MS (ESI) m/z 507.42 (100) (M+H)<sup>+</sup>, 254.21 (68) (M+2H)<sup>2+</sup>.

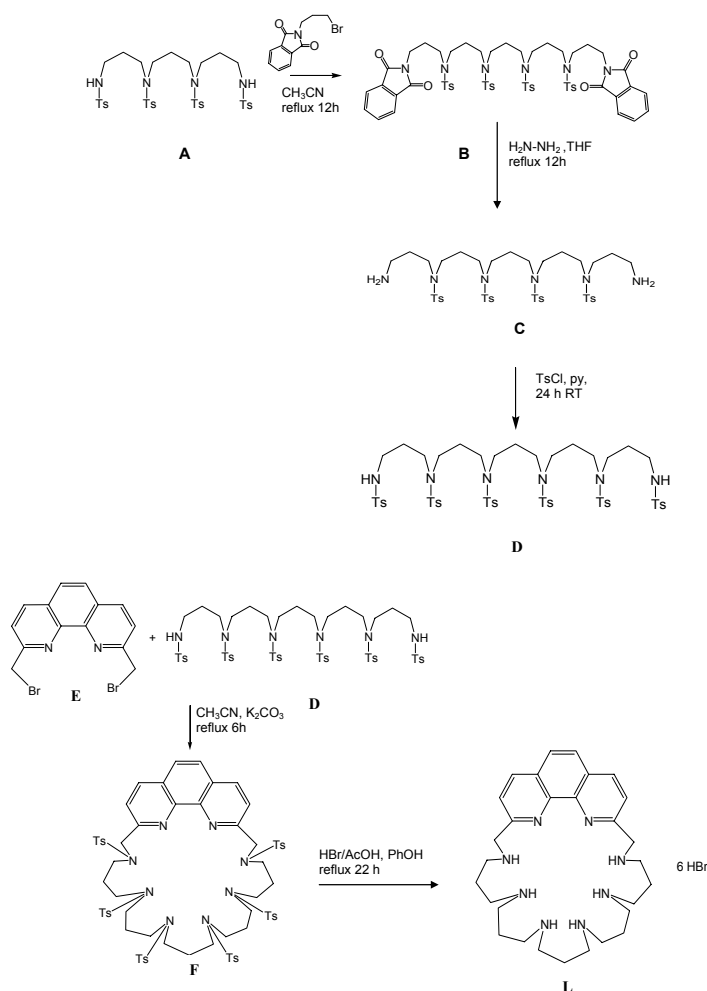

Scheme S1

**Potentiometric measurements.** The protonation constants of L and the formation constants of its anion complexes were determined by means of potentiometric measurements ( $\text{pH} = -\log [\text{H}^+]$ ) carried out in  $0.1 \text{ mol dm}^{-3} \text{ NMe}_4\text{Cl}$  at  $298.1 \pm 0.1 \text{ K}$  in the pH range 2.5-11. The reference electrode was an Ag/AgCl electrode in saturated KCl solution. The glass electrode was calibrated as a hydrogen concentration probe by titrating known amounts of HCl with  $\text{CO}_2$ -free NaOH solutions and determining the equivalent point by the Gran's method (G. Gran, *Analyst* (London), 1952, **77**, 661. F. J. Rossotti and H. Rossotti, *J. Chem. Educ.* 1965, **42**, 375) which allows to determine the standard potential  $E^0$ , and the ionic product of water ( $\text{pK}_w = 13.83 \pm 0.01$ ). Ligand concentration was about  $1 \cdot 10^{-3} \text{ M}$ , while substrate concentration was in the range  $5 \cdot 10^{-3}$ - $5 \cdot 10^{-4} \text{ M}$ . At least three measurements (about 100 experimental points each one) were performed for each system. The computer program HYPERQUAD (P. Gans, A. Sabatini and A. Vacca, *Talanta*, 1996, **43**, 807) was used to calculate the protonation constants and the stability constants of the complexes from e.m.f. data. The titration curves for each system were treated either as a single set or as separated entities without significant variations in the values of the basicity constants.

**Generation of the selectivity plot.** The selectivity plot in Figure 2 was obtained from the equilibrium constants given in Table S1 and S2 by using the computer program HYSS 2.0 (L. Alderighi, P. Gans, A. Ienco, D. Peters, A. Sabatini and A. Vacca, *Coord. Chem. Revs.*, **1999**, **184**, 311-318; the program can be downloaded free of charge at <http://www.chim1.unifi.it/group/vacsab/hyss.htm>). This program takes as input a set of equilibrium constants (in the present case the protonation constants of ligand and nucleotides, Table S1, and the cumulative formation constants of the adducts of ATP, TTP, CTP and GTP, Table S2) and reagent initial concentrations (in the present case  $[\text{L}] = [\text{ATP}] = [\text{CTP}] = [\text{TTP}] = [\text{GTP}] = 1 \times 10^{-4} \text{ M}$ ) and calculates from these data the concentrations of all the

complexed species formed (in the present case the concentrations of the products of the reactions given in Table S2) as a function of pH. For each nucleotide, the calculated concentrations of the complexed species at a given pH are then summed, affording the overall concentration of L complexed species with each nucleotide, i.e.,  $\Sigma[(H_nLATP)^{(n-4)+}]$ ,  $\Sigma[(H_nLCTP)^{(n-4)+}]$ ,  $\Sigma[(H_nLTTP)^{(n-4)+}]$ ,  $\Sigma[(H_nLGTP)^{(n-4)+}]$ . These values are then divided by the initial concentrations of the ligand L ( $1 \times 10^{-4}$  M in the present case), obtaining the overall percentage of L complexed species with each nucleotide at a given pH value. This calculation is repeated all over the pH range of interest (2-10 in the present case), affording the overall percentage of L complexed species with each nucleotide as a function of pH, reported in Figure 2.

**Spectroscopic measurements.**  $^1H$ ,  $^{13}C$  and  $^{31}P$  NMR spectra in  $D_2O$  solutions at different pH values were recorded at 298 K in a Varian 300 MHz spectrometer.  $^1H$ - $^1H$  and  $^1H$ - $^{13}C$  2D correlation experiments were performed to assign the signals. In the NMR titrations small amounts of  $0.01 \text{ mol dm}^{-3}$  NaOD or DCl solutions were used to adjust the pD. The pH was calculated from the measured pD values using the relationship:  $pH = pD - 0.40$  (A. K. Covington, M. Paabo, R. A. Robinson and R. G. Bates, *Anal. Chem.* 1968, **40**, 700.) UV-vis and fluorescence emission spectra were recorded respectively on a Perkin-Elmer Lambda 25 and LS-55 spectrometers at 298 K.

**MD calculations.** MD calculations were performed by using the AMBER3 forcefield, as implemented in the Hyperchem 7.51 package (Hyperchem  $\beta 1$  release 7.51 for Windows MM System, Hypercube, Inc., Gainesville, FL, 32601). Atomic charges for receptors and substrates were calculated at the PM3 semiempirical level. (J. P. P. Stewart, *J. Comput.-aided Mol. Des.*, 1990, **4**, 1) Starting conformations of the  $[H_6LATP]^{2+}$  or  $[H_6LCTP]^{2+}$  adducts, obtained by manual docking of the minimized conformer of the receptor to the substrate

(minimum distance between the atoms of receptor and substrate  $> 5 \text{ \AA}$ ), were freely minimized. The Polak-Ribiere (conjugate gradient) algorithm was used in the minimization procedures to a root-mean-square (RMS) energy gradient less than  $0.001 \text{ kcal mol}^{-1} \text{ \AA}^{-1}$ . Potential energy surface of both adducts was explored by means of simulated annealing (running temperature = 600 K, equilibration, running and cooling time = 10 ps, time step = 1.0 fs). For each  $[\text{H}_6\text{LA}]^{2+}$  adduct, 80 conformations were sampled, which were subsequently clusterized ( $\text{RMS} \leq 1.0 \text{ \AA}$ ). A distance-dependent dielectric factor ( $\epsilon = 4 R_{ij}$ ) was used.

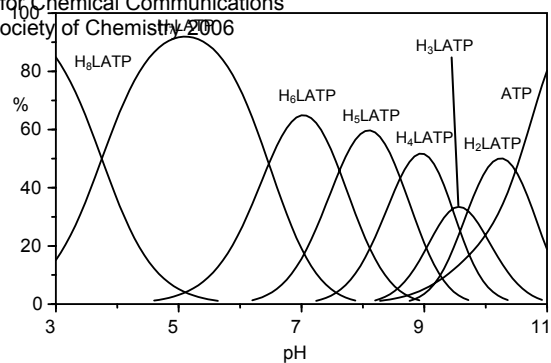

**Figure S1.** Distribution diagram for the system L-ATP ( $[L] = [ATP] = 1 \times 10^{-3}$  M,  $NMe_4Cl$  0.1 M, 298.1 K)

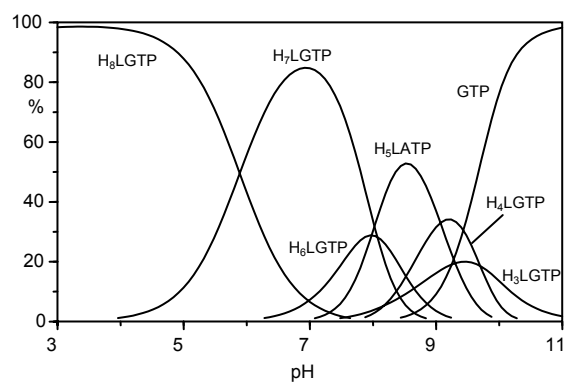

**Figure S2.** Distribution diagram for the system L-GTP ( $[L] = [GTP] = 1 \times 10^{-3}$  M,  $NMe_4Cl$  0.1 M, 298.1 K)

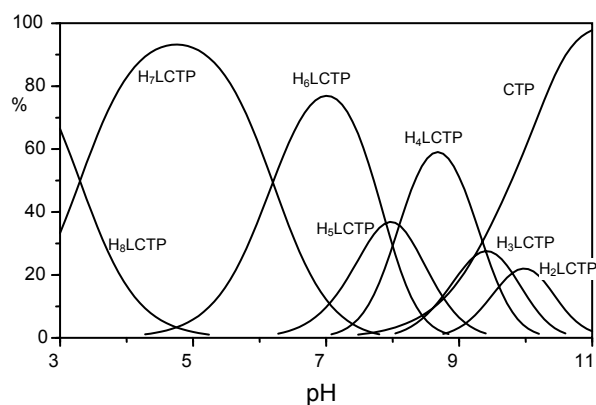

**Figure S3.** Distribution diagram for the system L-CTP ( $[L] = [CTP] = 1 \times 10^{-3}$  M,  $NMe_4Cl$  0.1 M, 298.1 K)

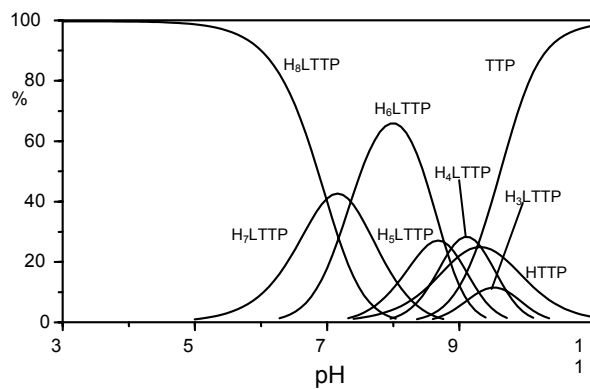

**Figure S4.** Distribution diagram for the system L-TTP ( $[L] = [TTP] = 1 \times 10^{-3}$  M,  $\text{NMe}_4\text{Cl}$  0.1 M, 298.1 K)

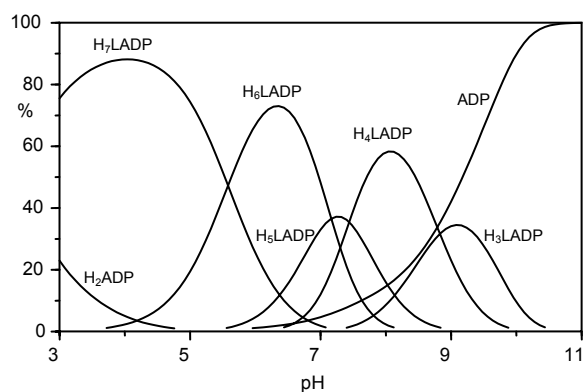

**Figure S5.** Distribution diagram for the system L-ADP ( $[L] = [ADP] = 1 \times 10^{-3}$  M,  $\text{NMe}_4\text{Cl}$  0.1 M, 298.1 K)

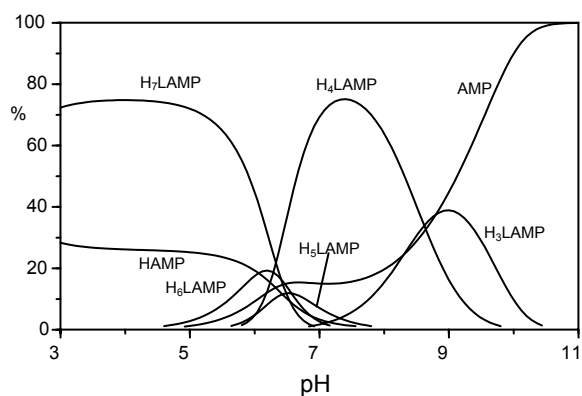

**Figure S6.** Distribution diagram for the system L-AMP ( $[L] = [AMP] = 1 \times 10^{-3}$  M,  $\text{NMe}_4\text{Cl}$  0.1 M, 298.1 K)



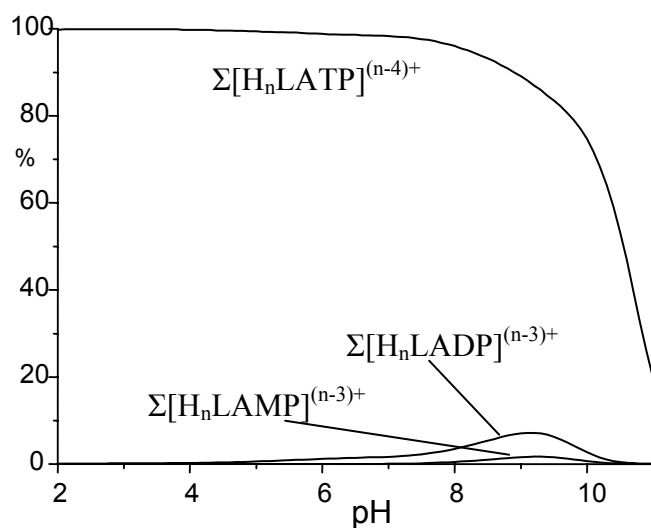

**Figure S7.** Overall percentages of L complexed species as a function of pH in a competing system containing L, ATP, ADP and AMP in equimolar ratio at 298 K ( $[\text{L}] = [\text{ATP}] = [\text{ADP}] = [\text{AMP}] = 0.001 \text{ M}$ )

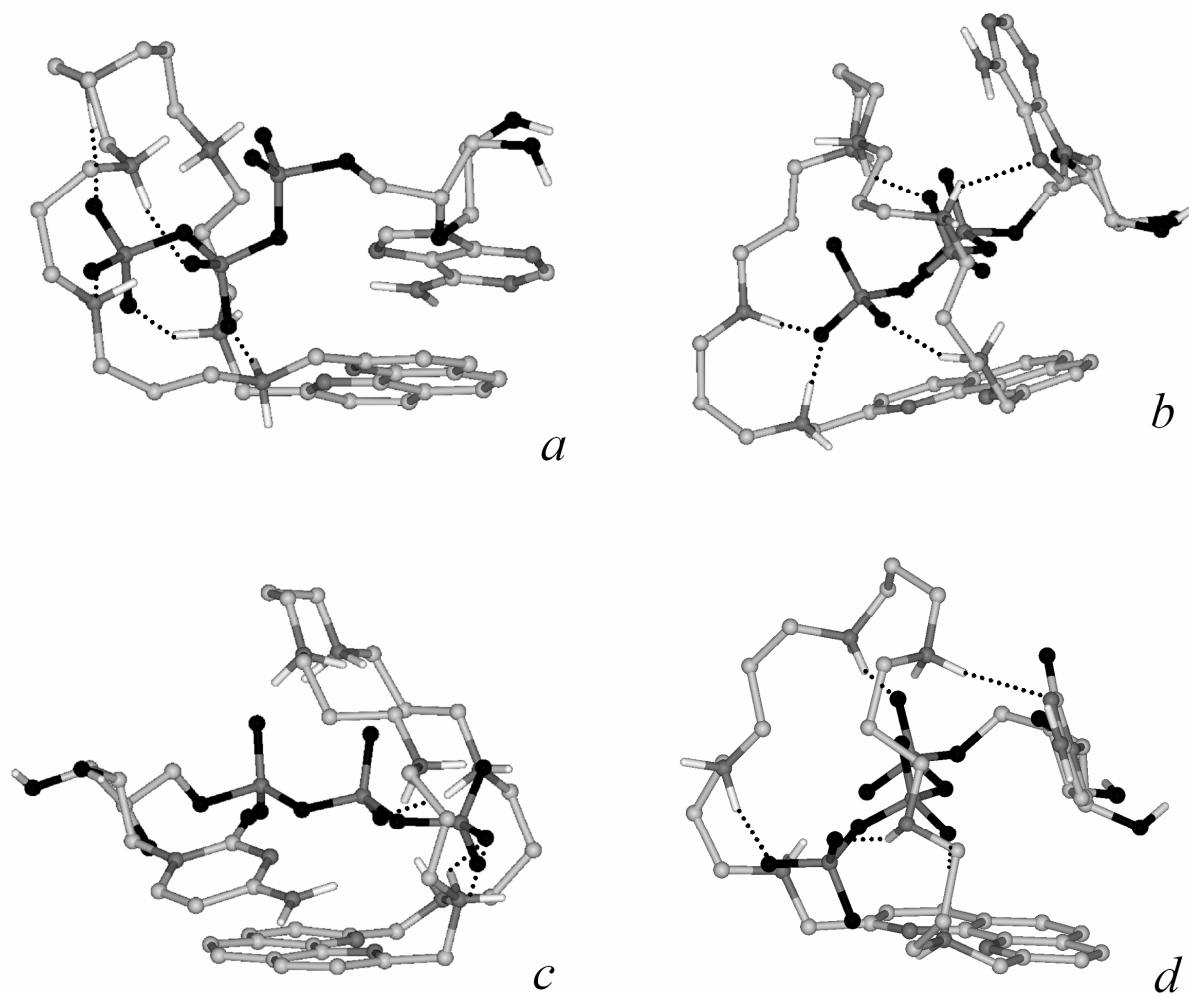

**Figure S8.** Low energy conformers of the adducts between  $[H_6L]^{6+}$  and ATP in the A (a) and B (b) families and between  $[H_6L]^{6+}$  and CTP in the A (a) and B (b) families. Only hydrogen bonds with N-H...O distances lower than 2 Å are reported.



**Table S2.** Cumulative formation constants of the adducts of ATP, TTP, CTP and GTP with L  
 (0.1 M NMe<sub>4</sub>Cl, 298.1 K)

| Reaction                                                                   | Log β                 |                       |
|----------------------------------------------------------------------------|-----------------------|-----------------------|
|                                                                            | A <sup>4-</sup> = ATP | A <sup>4-</sup> = CTP |
| L + 2 H <sup>+</sup> + A <sup>4-</sup> = [H <sub>2</sub> LA] <sup>2-</sup> | 24.53(2)              | 23.40(3)              |
| L + 3 H <sup>+</sup> + A <sup>4-</sup> = [H <sub>3</sub> LA] <sup>-</sup>  | 34.24(2)              | 33.21(3)              |
| L + 4 H <sup>+</sup> + A <sup>4-</sup> = [H <sub>4</sub> LA]               | 43.70(2)              | 42.60(3)              |
| L + 5 H <sup>+</sup> + A <sup>4-</sup> = [H <sub>5</sub> LA] <sup>+</sup>  | 52.31(2)              | 50.69(4)              |
| L + 6 H <sup>+</sup> + A <sup>4-</sup> = [H <sub>6</sub> LA] <sup>2+</sup> | 59.93(3)              | 58.64(5)              |
| L + 7 H <sup>+</sup> + A <sup>4-</sup> = [H <sub>7</sub> LA] <sup>3+</sup> | 66.40(3)              | 64.83(5)              |
| L + 8 H <sup>+</sup> + A <sup>4-</sup> = [H <sub>8</sub> LA] <sup>4+</sup> | 70.15(3)              | 68.10(5)              |
|                                                                            | A <sup>5-</sup> = TTP | A <sup>4-</sup> = GTP |
| L + 3 H <sup>+</sup> + A <sup>5-</sup> = [H <sub>3</sub> LA] <sup>2-</sup> | 32.54(3)              | 32.36(1)              |
| L + 4 H <sup>+</sup> + A <sup>5-</sup> = [H <sub>5</sub> LA] <sup>-</sup>  | 42.25(3)              | 42.55(2)              |
| L + 5 H <sup>+</sup> + A <sup>5-</sup> = [H <sub>5</sub> LA]               | 51.13(4)              | 51.62(3)              |
| L + 6 H <sup>+</sup> + A <sup>5-</sup> = [H <sub>6</sub> LA] <sup>+</sup>  | 59.90(4)              | 59.60(3)              |
| L + 7 H <sup>+</sup> + A <sup>5-</sup> = [H <sub>7</sub> LA] <sup>2+</sup> | 67.26(4)              | 67.67(3)              |
| L + 8 H <sup>+</sup> + A <sup>5-</sup> = [H <sub>8</sub> LA] <sup>3+</sup> | 74.25(4)              | 73.56(6)              |

**Table S3.** Stepwise formation constants of the adducts of ATP, TTP, CTP and GTP with L  
 (0.1 M NMe<sub>4</sub>Cl, 298.1 K)

| Reaction                                                                                                | Log K                 |                       |
|---------------------------------------------------------------------------------------------------------|-----------------------|-----------------------|
|                                                                                                         | ATP = A <sup>4-</sup> | CTP = A <sup>4-</sup> |
| [H <sub>2</sub> L] <sup>2+</sup> + A <sup>4-</sup> = [H <sub>2</sub> LA] <sup>2-</sup>                  | 4.29                  | 3.16                  |
| [H <sub>3</sub> L] <sup>3+</sup> + A <sup>4-</sup> = [H <sub>3</sub> LA] <sup>-</sup>                   | 5.41                  | 4.38                  |
| [H <sub>4</sub> L] <sup>4+</sup> + A <sup>4-</sup> = [H <sub>4</sub> LA]                                | 7.08                  | 5.98                  |
| [H <sub>4</sub> L] <sup>4+</sup> + [HA] <sup>3-</sup> = [H <sub>5</sub> LA] <sup>+</sup>                | 8.86                  | 7.84                  |
| [H <sub>5</sub> L] <sup>5+</sup> + [A] <sup>4-</sup> = [H <sub>5</sub> LA] <sup>2+</sup>                | 8.89                  | 7.27                  |
| [H <sub>5</sub> L] <sup>5+</sup> + [HA] <sup>3-</sup> = [H <sub>6</sub> LA] <sup>2+</sup>               | 9.68                  | 8.95                  |
| [H <sub>6</sub> L] <sup>6+</sup> + [HA] <sup>3-</sup> = [H <sub>7</sub> LA] <sup>3+</sup>               | 9.55                  | 8.58                  |
| [H <sub>6</sub> L] <sup>6+</sup> + A <sup>4-</sup> = [H <sub>6</sub> LA] <sup>2+</sup>                  | 9.91                  | 8.62                  |
| [H <sub>6</sub> L] <sup>6+</sup> + [H <sub>2</sub> A] <sup>2-</sup> = [H <sub>8</sub> LA] <sup>2+</sup> | 9.17                  | 8.06                  |
|                                                                                                         | TTP = A <sup>5-</sup> | GTP = A <sup>5-</sup> |
| [H <sub>2</sub> L] <sup>2+</sup> + [HA] <sup>4-</sup> = [H <sub>3</sub> LA] <sup>2-</sup>               | 3.03                  | 2.87                  |
| [H <sub>3</sub> L] <sup>3+</sup> + [HA] <sup>4-</sup> = [H <sub>4</sub> LA] <sup>-</sup>                | 4.15                  | 4.47                  |
| [H <sub>4</sub> L] <sup>4+</sup> + [HA] <sup>4-</sup> = [H <sub>5</sub> LA]                             | 5.24                  | 5.75                  |
| [H <sub>4</sub> L] <sup>4+</sup> + [H <sub>2</sub> A] <sup>3-</sup> = [H <sub>6</sub> LA] <sup>+</sup>  | 7.11                  | 6.60                  |
| [H <sub>5</sub> L] <sup>5+</sup> + [HA] <sup>4-</sup> = [H <sub>6</sub> LA] <sup>+</sup>                | 7.21                  | 6.93                  |
| [H <sub>5</sub> L] <sup>5+</sup> + [H <sub>2</sub> A] <sup>3-</sup> = [H <sub>7</sub> LA] <sup>2+</sup> | 7.67                  | 7.87                  |
| [H <sub>6</sub> L] <sup>6+</sup> + [HA] <sup>4-</sup> = [H <sub>7</sub> LA] <sup>2+</sup>               | 7.98                  | 8.40                  |
| [H <sub>6</sub> L] <sup>6+</sup> + [H <sub>2</sub> A] <sup>2-</sup> = [H <sub>8</sub> LA] <sup>2+</sup> | 8.06                  | 7.16                  |

**Table S4.** Cumulative formation constants of the adducts of ADP and AMP with L (0.1 M NMe<sub>4</sub>Cl, 298.1 K)

| A = ADP <sup>3-</sup>               |          |
|-------------------------------------|----------|
| Reaction                            | Log β    |
| $L + 3 H^+ + A^{3-} = [H_3LA]$      | 32.70(2) |
| $L + 4 H^+ + A^{3-} = [H_4LA]^+$    | 41.53(2) |
| $L + 5 H^+ + A^{3-} = [H_5LA]^{2+}$ | 48.97(2) |
| $L + 6 H^+ + A^{3-} = [H_6LA]^{3+}$ | 56.12(2) |
| $L + 7 H^+ + A^{3-} = [H_7LA]^{4+}$ | 61.71(3) |

| A = AMP <sup>2-</sup>               |          |
|-------------------------------------|----------|
| Reaction                            | Log β    |
| $L + 3 H^+ + A^{2-} = [H_3LA]^+$    | 32.10(5) |
| $L + 4 H^+ + A^{2-} = [H_4LA]^{2+}$ | 40.72(5) |
| $L + 5 H^+ + A^{2-} = [H_5LA]^{3+}$ | 46.73(7) |
| $L + 6 H^+ + A^{2-} = [H_6LA]^{4+}$ | 53.30(7) |
| $L + 7 H^+ + A^{2-} = [H_7LA]^{5+}$ | 59.67(7) |

**Table S5.** Stepwise formation constants of the adducts of ATP, TTP, CTP and GTP with L  
 (0.1 M NMe<sub>4</sub>Cl, 298.1 K)

| A = ADP <sup>3-</sup>                                                       |       |
|-----------------------------------------------------------------------------|-------|
| Reaction                                                                    | Log K |
| $[\text{H}_3\text{L}]^{3+} + \text{A}^{3-} = [\text{H}_3\text{LA}]$         | 3.87  |
| $[\text{H}_4\text{L}]^{4+} + \text{A}^{3-} = [\text{H}_4\text{LA}]^-$       | 4.91  |
| $[\text{H}_4\text{L}]^{4+} + [\text{HA}]^{2-} = [\text{H}_5\text{LA}]^{2+}$ | 5.76  |
| $[\text{H}_5\text{L}]^{5+} + [\text{A}]^{3-} = [\text{H}_5\text{LA}]^{2+}$  | 5.55  |
| $[\text{H}_5\text{L}]^{5+} + [\text{HA}]^{2-} = [\text{H}_6\text{LA}]^{3+}$ | 6.11  |
| $[\text{H}_6\text{L}]^{6+} + \text{A}^{3-} = [\text{H}_6\text{LA}]^{3+}$    | 6.10  |
| $[\text{H}_6\text{L}]^{6+} + [\text{HA}]^{2-} = [\text{H}_7\text{LA}]^{4+}$ | 5.10  |

| A = AMP <sup>2-</sup>                                                      |       |
|----------------------------------------------------------------------------|-------|
| Reaction                                                                   | Log K |
| $[\text{H}_3\text{L}]^{3+} + \text{A}^{2-} = [\text{H}_3\text{LA}]^-$      | 3.27  |
| $[\text{H}_4\text{L}]^{4+} + \text{A}^{2-} = [\text{H}_4\text{LA}]$        | 4.25  |
| $[\text{H}_4\text{L}]^{4+} + [\text{HA}]^- = [\text{H}_5\text{LA}]^+$      | 3.87  |
| $[\text{H}_5\text{L}]^{5+} + [\text{A}]^{2-} = [\text{H}_6\text{LA}]^{2+}$ | 4.31  |
| $[\text{H}_5\text{L}]^{5+} + [\text{HA}]^- = [\text{H}_6\text{LA}]^{2+}$   | 3.64  |
| $[\text{H}_6\text{L}]^{6+} + \text{A}^{2-} = [\text{H}_6\text{LA}]^{2+}$   | 3.28  |
| $[\text{H}_6\text{L}]^{6+} + [\text{HA}]^- = [\text{H}_7\text{LA}]^{3+}$   | 3.30  |

**Table S6.**  $^{31}\text{P}$  NMR shifts ( $\delta$ , ppm) for the L adducts with ATP, ADP, AMP, CTP, GTP and TTP and complexation-induced  $^{31}\text{P}$  NMR chemical shifts (CIS, ppm), measured in  $\text{D}_2\text{O}$  solution at pH 6, 298 K.

|                      | ATP               |                  |                   | ADP               |                  | AMP               |  |  |
|----------------------|-------------------|------------------|-------------------|-------------------|------------------|-------------------|--|--|
|                      | $\text{P}_\alpha$ | $\text{P}_\beta$ | $\text{P}_\gamma$ | $\text{P}_\alpha$ | $\text{P}_\beta$ | $\text{P}_\alpha$ |  |  |
| $\delta(\text{ppm})$ | -9.9              | -20.3            | -5.2              | -8.1              | -5.5             | -6.1              |  |  |
| CIS                  | 1.0               | 2.7              | 4.8               | 0.4               | 2.1              | 1.4               |  |  |

  

|                      | CTP               |                  |                   | TTP               |                  |                   | GTP               |                  |                   |
|----------------------|-------------------|------------------|-------------------|-------------------|------------------|-------------------|-------------------|------------------|-------------------|
|                      | $\text{P}_\alpha$ | $\text{P}_\beta$ | $\text{P}_\gamma$ | $\text{P}_\alpha$ | $\text{P}_\beta$ | $\text{P}_\gamma$ | $\text{P}_\alpha$ | $\text{P}_\beta$ | $\text{P}_\gamma$ |
| $\delta(\text{ppm})$ | -10.5             | -21.5            | -6.5              | -10.8             | -22.2            | -7.6              | -10.9             | -21.9            | -7.4              |
| CIS                  | 0.4               | 1.2              | 3.8               | 0.1               | 0.9              | 2.9               | 0.2               | 1.1              | 3.2               |

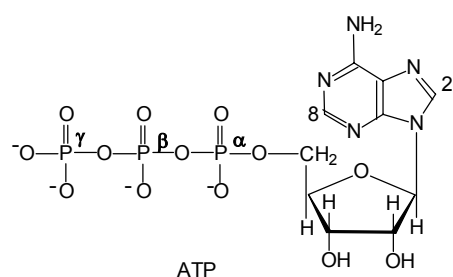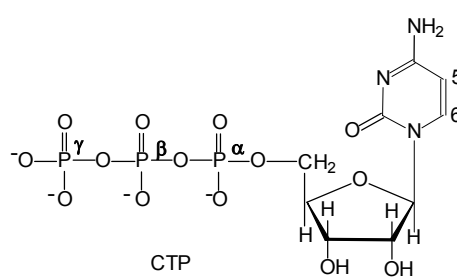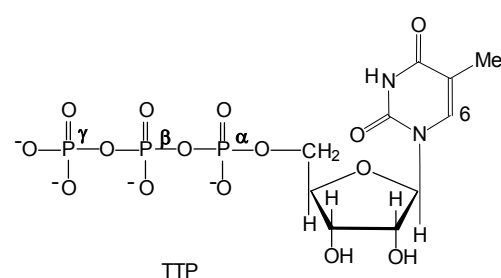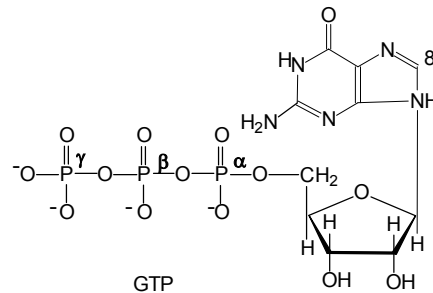



**Table S7.**  $^1\text{H}$  NMR shifts ( $\delta$ , ppm) of the aromatic protons of L and of nucleotides in the complexes with ATP, ADP, AMP, TTP, GTP and CTP and corresponding complexation-induced  $^1\text{H}$  NMR chemical shifts (CIS, ppm), measured in  $\text{D}_2\text{O}$  solution at pH 6 and 298 K.

|     |            |       |       |       |       |       |
|-----|------------|-------|-------|-------|-------|-------|
|     |            | H7    | H6    | H8    | H8    | H2    |
| L   | $\delta$   | 8.27  | 7.63  | 7.65  |       |       |
| ATP | $\delta$   |       |       |       | 7.91  | 7.49  |
|     | CIS        | -0.26 | -0.32 | -0.14 | -0.60 | -0.76 |
|     |            |       |       |       | H8    | H2    |
| L   | $\delta$   | 8.37  | 7.76  | 7.72  |       |       |
| ADP | $\delta$   |       |       |       | 8.21  | 7.76  |
|     | CIS        | -0.16 | -0.19 | -0.08 | -0.32 | -0.46 |
|     |            |       |       |       | H8    | H2    |
| L   | $\delta$   | 8.39  | 7.80  | 7.70  |       |       |
| AMP | $\delta$   |       |       |       | 8.30  | 7.88  |
|     | CIS        | -0.14 | -0.15 | -0.10 | -0.21 | -0.32 |
|     |            |       |       |       | H6    | H5    |
| L   | $\delta^a$ | 8.39  | 7.73  | 7.72  |       |       |
| CTP | $\delta$   |       |       |       | 7.67  | 6.02  |
|     | CIS        | -0.14 | -0.22 | -0.08 | -0.28 | -0.20 |
|     |            |       |       |       | H6    |       |
| L   | $\delta^a$ | 8.35  | 7.75  | 7.71  |       |       |
| TTP | $\delta$   |       |       |       | 7.43  |       |
|     | CIS        | -0.18 | -0.20 | -0.09 | -0.35 |       |
|     |            |       |       |       | H8    |       |
| L   | $\delta^a$ | 8.35  | 7.67  | 7.70  |       |       |
| GTP | $\delta$   |       |       |       | 7.79  |       |
|     | CIS        | -0.23 | -0.28 | -0.10 | -0.44 |       |

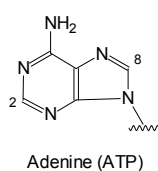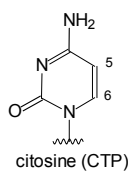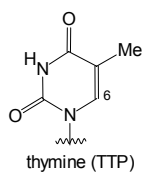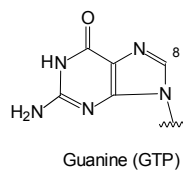

**Table S8.** Atomic coordinates and atomic charge of the lowest energy conformer of the adducts between  $[\text{H}_6\text{L}]^{6+}$  and ATP in the A family

| Atom | Atom type | X      | Y      | Z      | Atomic charge |
|------|-----------|--------|--------|--------|---------------|
| C1   | CA        | -1.105 | -3.798 | -3.485 | -0.1328       |
| C2   | CA        | -0.601 | -3.601 | -2.186 | -0.17513      |
| N3   | NC        | 0.498  | -2.846 | -1.995 | 0.01778       |
| C4   | CA        | 1.149  | -2.245 | -3.009 | -0.03796      |
| C5   | CA        | 0.683  | -2.396 | -4.332 | -0.02075      |
| C6   | CA        | -0.449 | -3.197 | -4.573 | 0.015618      |
| C7   | CA        | 1.335  | -1.734 | -5.389 | -0.03675      |
| C8   | CA        | 2.466  | -0.94  | -5.129 | -0.02668      |
| C9   | CA        | 2.97   | -0.839 | -3.819 | -0.02637      |
| C10  | CA        | 2.306  | -1.485 | -2.755 | -0.04049      |
| N11  | NC        | 2.806  | -1.409 | -1.506 | 0.009749      |
| C12  | CA        | 3.935  | -0.735 | -1.211 | -0.16911      |
| C13  | CA        | 4.624  | -0.051 | -2.231 | -0.12625      |
| C14  | CA        | 4.139  | -0.104 | -3.549 | 0.011956      |
| C15  | CT        | -1.245 | -4.25  | -0.979 | -0.14554      |
| N16  | N3        | -1.839 | -3.209 | -0.121 | 0.577409      |
| C17  | CT        | -3.183 | -2.755 | -0.537 | -0.20284      |
| C18  | CT        | -3.733 | -1.677 | 0.407  | -0.11698      |
| C19  | CT        | -3.074 | -0.317 | 0.143  | -0.20093      |
| N20  | N3        | -3.14  | 0.599  | 1.299  | 0.589054      |
| C21  | CT        | -4.472 | 0.805  | 1.899  | -0.20577      |
| C22  | CT        | -4.583 | 2.145  | 2.641  | -0.12394      |
| C23  | CT        | -3.474 | 2.453  | 3.661  | -0.20394      |
| N24  | N3        | -3.348 | 1.425  | 4.715  | 0.589252      |
| C25  | CT        | -2.623 | 1.874  | 5.926  | -0.2095       |
| C26  | CT        | -1.169 | 2.319  | 5.675  | -0.11103      |
| C27  | CT        | -0.389 | 1.207  | 4.968  | -0.20351      |
| N28  | N3        | 1.073  | 1.417  | 4.869  | 0.585195      |
| C29  | CT        | 1.854  | 1.411  | 6.128  | -0.21388      |
| C30  | CT        | 1.825  | 0.078  | 6.903  | -0.13443      |
| C31  | CT        | 2.864  | -0.963 | 6.455  | -0.20519      |
| N32  | N3        | 2.648  | -1.47  | 5.085  | 0.572408      |
| C33  | CT        | 3.563  | -2.575 | 4.723  | -0.19482      |
| C34  | CT        | 3.528  | -2.886 | 3.222  | -0.13888      |
| C35  | CT        | 4.308  | -1.836 | 2.415  | -0.21261      |
| N36  | N3        | 3.926  | -1.854 | 0.988  | 0.580888      |
| C37  | CT        | 4.458  | -0.715 | 0.213  | -0.1467       |
| H38  | HC        | -1.981 | -4.408 | -3.652 | 0.123905      |
| H39  | HC        | -0.829 | -3.332 | -5.575 | 0.164819      |
| H40  | HC        | 0.959  | -1.811 | -6.399 | 0.159174      |
| H41  | HC        | 2.953  | -0.428 | -5.946 | 0.159246      |
| H42  | HC        | 5.519  | 0.511  | -2.008 | 0.134373      |
| H43  | HC        | 4.662  | 0.416  | -4.339 | 0.166027      |
| H44  | HC        | -0.462 | -4.752 | -0.408 | 0.095495      |

|     |    |        |        |        |          |
|-----|----|--------|--------|--------|----------|
| H45 | HC | -1.993 | -4.989 | -1.268 | 0.085857 |
| H46 | H3 | -1.206 | -2.421 | -0.097 | 0.108636 |
| H47 | H3 | -1.907 | -3.567 | 0.823  | 0.130688 |
| H48 | HC | -3.855 | -3.613 | -0.503 | 0.1508   |
| H49 | HC | -3.155 | -2.373 | -1.558 | 0.113028 |
| H50 | HC | -3.569 | -1.994 | 1.436  | 0.047267 |
| H51 | HC | -4.809 | -1.581 | 0.248  | 0.108506 |
| H52 | HC | -3.549 | 0.154  | -0.718 | 0.163462 |
| H53 | HC | -2.019 | -0.457 | -0.084 | 0.111914 |
| H54 | H3 | -2.766 | 1.492  | 1      | 0.124064 |
| H55 | H3 | -2.523 | 0.246  | 2.019  | 0.116603 |
| H56 | HC | -4.686 | -0.02  | 2.58   | 0.091277 |
| H57 | HC | -5.224 | 0.806  | 1.109  | 0.122585 |
| H58 | HC | -5.548 | 2.173  | 3.151  | 0.123839 |
| H59 | HC | -4.575 | 2.944  | 1.898  | 0.084768 |
| H60 | HC | -3.729 | 3.404  | 4.13   | 0.084805 |
| H61 | HC | -2.521 | 2.577  | 3.149  | 0.146428 |
| H62 | H3 | -2.896 | 0.603  | 4.332  | 0.1199   |
| H63 | H3 | -4.28  | 1.161  | 5.004  | 0.137569 |
| H64 | HC | -2.617 | 1.045  | 6.635  | 0.15989  |
| H65 | HC | -3.168 | 2.701  | 6.383  | 0.120342 |
| H66 | HC | -0.725 | 2.533  | 6.647  | 0.044091 |
| H67 | HC | -1.143 | 3.229  | 5.073  | 0.097385 |
| H68 | HC | -0.755 | 1.168  | 3.948  | 0.160783 |
| H69 | HC | -0.606 | 0.263  | 5.461  | 0.12595  |
| H70 | H3 | 1.227  | 2.298  | 4.396  | 0.114203 |
| H71 | H3 | 1.441  | 0.691  | 4.265  | 0.140297 |
| H72 | HC | 1.475  | 2.201  | 6.775  | 0.11756  |
| H73 | HC | 2.89   | 1.656  | 5.89   | 0.067235 |
| H74 | HC | 0.834  | -0.372 | 6.907  | 0.110313 |
| H75 | HC | 2.067  | 0.317  | 7.94   | 0.146602 |
| H76 | HC | 2.808  | -1.806 | 7.145  | 0.168704 |
| H77 | HC | 3.861  | -0.526 | 6.523  | 0.116614 |
| H78 | H3 | 2.784  | -0.708 | 4.435  | 0.05066  |
| H79 | H3 | 1.692  | -1.791 | 4.986  | 0.102619 |
| H80 | HC | 3.255  | -3.465 | 5.273  | 0.137401 |
| H81 | HC | 4.587  | -2.326 | 5.007  | 0.161036 |
| H82 | HC | 2.486  | -2.928 | 2.901  | 0.148402 |
| H83 | HC | 3.979  | -3.864 | 3.044  | 0.088235 |
| H84 | HC | 5.378  | -2.027 | 2.507  | 0.060139 |
| H85 | HC | 4.107  | -0.842 | 2.811  | 0.139681 |
| H86 | H3 | 2.917  | -1.827 | 0.928  | 0.118718 |
| H87 | H3 | 4.245  | -2.717 | 0.572  | 0.085527 |
| H88 | HC | 5.548  | -0.764 | 0.207  | 0.151289 |
| H89 | HC | 4.146  | 0.218  | 0.683  | 0.104764 |
| P90 | P  | 0.514  | 1.867  | 1.101  | 2.009335 |
| O91 | O2 | -0.941 | 2.132  | 1.185  | -1.05022 |
| O92 | O2 | 1.307  | 2.43   | 2.22   | -0.98477 |
| O93 | OS | 0.957  | 2.771  | -0.156 | -0.67472 |
| C94 | CT | 2.315  | 2.912  | -0.526 | 0.159793 |
| H95 | HC | 2.737  | 3.792  | -0.038 | -0.04446 |
| H96 | HC | 2.89   | 2.036  | -0.224 | 0.059178 |

|      |    |        |        |        |          |
|------|----|--------|--------|--------|----------|
| C97  | CT | 2.431  | 3.044  | -2.047 | -0.01126 |
| H98  | HC | 3.487  | 3.144  | -2.304 | 0.008287 |
| O99  | OS | 1.91   | 1.863  | -2.635 | -0.18404 |
| C100 | CT | 0.917  | 2.21   | -3.581 | 0.080649 |
| H101 | HC | 1.395  | 2.318  | -4.556 | 0.033305 |
| N102 | N* | -0.151 | 1.188  | -3.627 | 0.248362 |
| C103 | CK | -0.767 | 0.547  | -2.582 | -0.29389 |
| H104 | HC | -0.488 | 0.708  | -1.555 | 0.123003 |
| N105 | NB | -1.722 | -0.266 | -2.938 | 0.032541 |
| C106 | CB | -1.744 | -0.162 | -4.322 | -0.19935 |
| C107 | CA | -2.528 | -0.78  | -5.322 | -0.01802 |
| N108 | N2 | -3.5   | -1.66  | -5.047 | 0.162375 |
| H109 | H2 | -3.699 | -1.906 | -4.088 | 0.099137 |
| H110 | H2 | -4.029 | -2.082 | -5.797 | 0.001897 |
| N111 | NC | -2.272 | -0.476 | -6.612 | -0.3152  |
| C112 | CQ | -1.305 | 0.396  | -6.892 | -0.02358 |
| H113 | HC | -1.147 | 0.602  | -7.94  | 0.049999 |
| N114 | NC | -0.508 | 1.049  | -6.047 | -0.27656 |
| C115 | CB | -0.781 | 0.719  | -4.754 | -0.06355 |
| C116 | CT | 1.636  | 4.23   | -2.607 | 0.047367 |
| H117 | HC | 1.422  | 4.989  | -1.853 | 0.060904 |
| C118 | CT | 0.368  | 3.556  | -3.117 | 0.024474 |
| H119 | HC | -0.337 | 3.419  | -2.296 | 0.133937 |
| O120 | OH | -0.236 | 4.286  | -4.164 | -0.34059 |
| H121 | HO | 0.444  | 4.508  | -4.804 | 0.193113 |
| O122 | OH | 2.346  | 4.806  | -3.686 | -0.33179 |
| O123 | O2 | 0.886  | 0.501  | 0.646  | -0.88905 |
| P124 | P  | 0.734  | -0.564 | 1.67   | 2.083591 |
| O125 | O2 | 1.048  | -1.861 | 1.025  | -0.98084 |
| O126 | O2 | 1.706  | -0.325 | 2.764  | -1.11972 |
| O127 | O2 | -0.658 | -0.577 | 2.198  | -0.89827 |
| P128 | P  | -1.063 | -1.618 | 3.183  | 2.036215 |
| O129 | O2 | -1.314 | -2.905 | 2.498  | -1.05457 |
| O130 | O2 | -0.045 | -1.807 | 4.244  | -1.0194  |
| O131 | O2 | -2.322 | -1.145 | 3.809  | -1.03346 |
| H132 | HO | 2.549  | 4.118  | -4.323 | 0.159858 |

**Table S9.** Atomic coordinates and atomic charge of the lowest energy conformer of the adducts between  $[\text{H}_6\text{L}]^{6+}$  and ATP in the B family

| Atom | Atom type | X      | Y      | Z      | Atomic charge |
|------|-----------|--------|--------|--------|---------------|
| C1   | CA        | 2.162  | -1.481 | 5.784  | -0.1328       |
| C2   | CA        | 1.272  | -0.444 | 5.451  | -0.17513      |
| N3   | NC        | 1.574  | 0.404  | 4.444  | 0.01778       |
| C4   | CA        | 2.717  | 0.31   | 3.731  | -0.03796      |
| C5   | CA        | 3.648  | -0.708 | 4.039  | -0.02075      |
| C6   | CA        | 3.359  | -1.62  | 5.067  | 0.015618      |
| C7   | CA        | 4.844  | -0.82  | 3.31   | -0.03675      |
| C8   | CA        | 5.123  | 0.088  | 2.278  | -0.02668      |
| C9   | CA        | 4.191  | 1.087  | 1.948  | -0.02637      |
| C10  | CA        | 2.988  | 1.211  | 2.68   | -0.04049      |
| N11  | NC        | 2.121  | 2.201  | 2.377  | 0.009749      |
| C12  | CA        | 2.349  | 3.083  | 1.382  | -0.16911      |
| C13  | CA        | 3.513  | 2.976  | 0.598  | -0.12625      |
| C14  | CA        | 4.45   | 1.976  | 0.891  | 0.011956      |
| C15  | CT        | -0.015 | -0.3   | 6.239  | -0.14554      |
| N16  | N3        | -1.009 | 0.497  | 5.495  | 0.577409      |
| C17  | CT        | -2.339 | 0.621  | 6.13   | -0.20284      |
| C18  | CT        | -3.094 | -0.709 | 6.326  | -0.11698      |
| C19  | CT        | -3.556 | -1.408 | 5.036  | -0.20093      |
| N20  | N3        | -2.456 | -2.054 | 4.289  | 0.589054      |
| C21  | CT        | -2.907 | -2.816 | 3.109  | -0.20577      |
| C22  | CT        | -1.717 | -3.295 | 2.268  | -0.12394      |
| C23  | CT        | -2.172 | -3.774 | 0.882  | -0.20394      |
| N24  | N3        | -1.095 | -3.608 | -0.115 | 0.589252      |
| C25  | CT        | -1.277 | -4.339 | -1.383 | -0.2095       |
| C26  | CT        | -2.464 | -3.848 | -2.225 | -0.11103      |
| C27  | CT        | -2.25  | -2.463 | -2.855 | -0.20351      |
| N28  | N3        | -2.702 | -1.347 | -1.997 | 0.585195      |
| C29  | CT        | -2.787 | -0.069 | -2.733 | -0.21388      |
| C30  | CT        | -3.44  | 1.039  | -1.9   | -0.13443      |
| C31  | CT        | -3.621 | 2.337  | -2.7   | -0.20519      |
| N32  | N3        | -2.359 | 2.881  | -3.25  | 0.572408      |
| C33  | CT        | -1.282 | 3.191  | -2.287 | -0.19482      |
| C34  | CT        | -1.721 | 4.174  | -1.191 | -0.13888      |
| C35  | CT        | -0.528 | 4.735  | -0.405 | -0.21261      |
| N36  | N3        | 0.282  | 3.675  | 0.228  | 0.580888      |
| C37  | CT        | 1.355  | 4.188  | 1.099  | -0.1467       |
| H38  | HC        | 1.932  | -2.168 | 6.585  | 0.123905      |
| H39  | HC        | 4.044  | -2.42  | 5.309  | 0.164819      |
| H40  | HC        | 5.551  | -1.606 | 3.532  | 0.159174      |
| H41  | HC        | 6.053  | 0      | 1.735  | 0.159246      |
| H42  | HC        | 3.697  | 3.661  | -0.217 | 0.134373      |
| H43  | HC        | 5.356  | 1.899  | 0.306  | 0.166027      |
| H44  | HC        | 0.201  | 0.185  | 7.192  | 0.095495      |
| H45  | HC        | -0.4   | -1.3   | 6.427  | 0.085857      |
| H46  | H3        | -1.127 | 0.095  | 4.576  | 0.108636      |

|     |    |        |        |        |          |
|-----|----|--------|--------|--------|----------|
| H47 | H3 | -0.63  | 1.425  | 5.372  | 0.130688 |
| H48 | HC | -2.947 | 1.282  | 5.51   | 0.1508   |
| H49 | HC | -2.209 | 1.094  | 7.104  | 0.113028 |
| H50 | HC | -4     | -0.462 | 6.882  | 0.047267 |
| H51 | HC | -2.525 | -1.401 | 6.945  | 0.108506 |
| H52 | HC | -4.057 | -0.685 | 4.391  | 0.163462 |
| H53 | HC | -4.274 | -2.181 | 5.313  | 0.111914 |
| H54 | H3 | -1.944 | -2.67  | 4.904  | 0.124064 |
| H55 | H3 | -1.837 | -1.326 | 3.957  | 0.116603 |
| H56 | HC | -3.526 | -2.152 | 2.505  | 0.091277 |
| H57 | HC | -3.507 | -3.672 | 3.421  | 0.122585 |
| H58 | HC | -1.189 | -4.099 | 2.783  | 0.123839 |
| H59 | HC | -1.019 | -2.47  | 2.147  | 0.084768 |
| H60 | HC | -3.028 | -3.189 | 0.548  | 0.084805 |
| H61 | HC | -2.465 | -4.821 | 0.954  | 0.146428 |
| H62 | H3 | -0.228 | -3.937 | 0.291  | 0.1199   |
| H63 | H3 | -0.974 | -2.623 | -0.317 | 0.137569 |
| H64 | HC | -1.412 | -5.397 | -1.159 | 0.15989  |
| H65 | HC | -0.361 | -4.235 | -1.967 | 0.120342 |
| H66 | HC | -3.393 | -3.874 | -1.657 | 0.044091 |
| H67 | HC | -2.563 | -4.557 | -3.05  | 0.097385 |
| H68 | HC | -2.83  | -2.44  | -3.778 | 0.160783 |
| H69 | HC | -1.2   | -2.321 | -3.105 | 0.12595  |
| H70 | H3 | -2.064 | -1.237 | -1.216 | 0.114203 |
| H71 | H3 | -3.619 | -1.568 | -1.638 | 0.140297 |
| H72 | HC | -3.377 | -0.212 | -3.638 | 0.11756  |
| H73 | HC | -1.776 | 0.227  | -3.003 | 0.067235 |
| H74 | HC | -2.837 | 1.24   | -1.02  | 0.110313 |
| H75 | HC | -4.422 | 0.701  | -1.566 | 0.146602 |
| H76 | HC | -4.093 | 3.085  | -2.062 | 0.168704 |
| H77 | HC | -4.294 | 2.142  | -3.536 | 0.116614 |
| H78 | H3 | -2.583 | 3.73   | -3.748 | 0.05066  |
| H79 | H3 | -1.993 | 2.215  | -3.916 | 0.102619 |
| H80 | HC | -0.458 | 3.629  | -2.85  | 0.137401 |
| H81 | HC | -0.932 | 2.265  | -1.836 | 0.161036 |
| H82 | HC | -2.396 | 3.676  | -0.494 | 0.148402 |
| H83 | HC | -2.246 | 5.013  | -1.65  | 0.088235 |
| H84 | HC | -0.911 | 5.397  | 0.372  | 0.060139 |
| H85 | HC | 0.106  | 5.315  | -1.077 | 0.139681 |
| H86 | H3 | 0.695  | 3.097  | -0.493 | 0.118718 |
| H87 | H3 | -0.323 | 3.084  | 0.782  | 0.085527 |
| H88 | HC | 0.922  | 4.55   | 2.032  | 0.151289 |
| H89 | HC | 1.867  | 5.015  | 0.605  | 0.104764 |
| P90 | P  | 2.134  | -2.2   | 0.724  | 2.009335 |
| O91 | O2 | 1.818  | -2.284 | 2.168  | -1.05022 |
| O92 | O2 | 1.569  | -3.307 | -0.082 | -0.98477 |
| O93 | OS | 3.721  | -2.509 | 0.693  | -0.67472 |
| C94 | CT | 4.372  | -3.091 | -0.429 | 0.159793 |
| H95 | HC | 5.396  | -3.3   | -0.12  | -0.04446 |
| H96 | HC | 3.905  | -4.041 | -0.689 | 0.059178 |
| C97 | CT | 4.449  | -2.197 | -1.678 | -0.01126 |
| H98 | HC | 5.075  | -2.716 | -2.406 | 0.008287 |

|      |    |        |        |        |          |
|------|----|--------|--------|--------|----------|
| O99  | OS | 3.202  | -1.984 | -2.314 | -0.18404 |
| C100 | CT | 3.375  | -0.83  | -3.113 | 0.080649 |
| H101 | HC | 4.023  | -1.081 | -3.954 | 0.033305 |
| N102 | N* | 2.093  | -0.304 | -3.64  | 0.248362 |
| C103 | CK | 1.61   | 0.983  | -3.638 | -0.29389 |
| H104 | HC | 2.1    | 1.801  | -3.13  | 0.123003 |
| N105 | NB | 0.511  | 1.146  | -4.318 | 0.032541 |
| C106 | CB | 0.236  | -0.122 | -4.815 | -0.19935 |
| C107 | CA | -0.79  | -0.634 | -5.642 | -0.01802 |
| N108 | N2 | -1.775 | 0.126  | -6.141 | 0.162375 |
| H109 | H2 | -1.8   | 1.114  | -5.937 | 0.099137 |
| H110 | H2 | -2.483 | -0.287 | -6.731 | 0.001897 |
| N111 | NC | -0.764 | -1.947 | -5.953 | -0.3152  |
| C112 | CQ | 0.225  | -2.705 | -5.48  | -0.02358 |
| H113 | HC | 0.196  | -3.747 | -5.764 | 0.049999 |
| N114 | NC | 1.245  | -2.344 | -4.704 | -0.27656 |
| C115 | CB | 1.192  | -1.017 | -4.397 | -0.06355 |
| C116 | CT | 5.05   | -0.808 | -1.425 | 0.047367 |
| H117 | HC | 5.057  | -0.561 | -0.368 | 0.060904 |
| C118 | CT | 4.11   | 0.133  | -2.181 | 0.024474 |
| H119 | HC | 3.408  | 0.584  | -1.481 | 0.133937 |
| O120 | OH | 4.811  | 1.14   | -2.881 | -0.34059 |
| H121 | HO | 5.547  | 0.726  | -3.338 | 0.193113 |
| O122 | OH | 6.364  | -0.746 | -1.944 | -0.33179 |
| O123 | O2 | 2.062  | -0.843 | 0.124  | -0.88905 |
| P124 | P  | 0.694  | -0.272 | 0.005  | 2.083591 |
| O125 | O2 | 0.823  | 1.082  | -0.584 | -0.98084 |
| O126 | O2 | -0.124 | -1.108 | -0.911 | -1.11972 |
| O127 | O2 | 0.063  | -0.184 | 1.353  | -0.89827 |
| P128 | P  | -1.34  | 0.297  | 1.468  | 2.036215 |
| O129 | O2 | -1.461 | 1.702  | 1.019  | -1.05457 |
| O130 | O2 | -2.263 | -0.559 | 0.684  | -1.0194  |
| O131 | O2 | -1.74  | 0.222  | 2.891  | -1.03346 |
| H132 | HO | 6.904  | -1.392 | -1.483 | 0.159858 |

**Table S10.** Atomic coordinates and atomic charge of the lowest energy conformer of the adducts between  $[\text{H}_6\text{L}]^{6+}$  and CTP in the A family

| Atom | Atom type | X      | Y      | Z      | Atomic charge |
|------|-----------|--------|--------|--------|---------------|
| C1   | CA        | -0.103 | -4.153 | 1.937  | -0.1328       |
| C2   | CA        | -1.22  | -3.367 | 2.277  | -0.17513      |
| N3   | NC        | -1.839 | -2.631 | 1.333  | 0.01778       |
| C4   | CA        | -1.443 | -2.628 | 0.043  | -0.03796      |
| C5   | CA        | -0.356 | -3.435 | -0.359 | -0.02075      |
| C6   | CA        | 0.337  | -4.186 | 0.605  | 0.015618      |
| C7   | CA        | 0.002  | -3.516 | -1.716 | -0.03675      |
| C8   | CA        | -0.775 | -2.863 | -2.686 | -0.02668      |
| C9   | CA        | -1.855 | -2.054 | -2.292 | -0.02637      |
| C10  | CA        | -2.151 | -1.884 | -0.921 | -0.04049      |
| N11  | NC        | -3.128 | -1.031 | -0.55  | 0.009749      |
| C12  | CA        | -3.875 | -0.355 | -1.445 | -0.16911      |
| C13  | CA        | -3.689 | -0.569 | -2.824 | -0.12625      |
| C14  | CA        | -2.659 | -1.42  | -3.253 | 0.011956      |
| C15  | CT        | -1.754 | -3.377 | 3.694  | -0.14554      |
| N16  | N3        | -1.636 | -2.035 | 4.291  | 0.577409      |
| C17  | CT        | -1.998 | -2.006 | 5.723  | -0.20284      |
| C18  | CT        | -1.971 | -0.598 | 6.337  | -0.11698      |
| C19  | CT        | -0.566 | 0.014  | 6.453  | -0.20093      |
| N20  | N3        | -0.166 | 0.732  | 5.227  | 0.589054      |
| C21  | CT        | 1.164  | 1.37   | 5.274  | -0.20577      |
| C22  | CT        | 2.308  | 0.348  | 5.183  | -0.12394      |
| C23  | CT        | 3.637  | 1.035  | 4.849  | -0.20394      |
| N24  | N3        | 3.757  | 1.394  | 3.417  | 0.589252      |
| C25  | CT        | 4.934  | 2.255  | 3.173  | -0.2095       |
| C26  | CT        | 5.336  | 2.366  | 1.696  | -0.11103      |
| C27  | CT        | 4.453  | 3.274  | 0.828  | -0.20351      |
| N28  | N3        | 3.135  | 2.696  | 0.489  | 0.585195      |
| C29  | CT        | 2.519  | 3.393  | -0.662 | -0.21388      |
| C30  | CT        | 1.054  | 3.009  | -0.9   | -0.13443      |
| C31  | CT        | 0.083  | 3.788  | 0      | -0.20519      |
| N32  | N3        | -1.336 | 3.511  | -0.32  | 0.572408      |
| C33  | CT        | -1.806 | 4.084  | -1.6   | -0.19482      |
| C34  | CT        | -3.335 | 4.061  | -1.752 | -0.13888      |
| C35  | CT        | -3.92  | 2.665  | -2.009 | -0.21261      |
| N36  | N3        | -4.307 | 1.968  | -0.765 | 0.580888      |
| C37  | CT        | -4.911 | 0.634  | -0.952 | -0.1467       |
| H38  | HC        | 0.422  | -4.726 | 2.687  | 0.123905      |
| H39  | HC        | 1.198  | -4.779 | 0.336  | 0.164819      |
| H40  | HC        | 0.845  | -4.116 | -2.027 | 0.159174      |
| H41  | HC        | -0.526 | -2.974 | -3.731 | 0.159246      |
| H42  | HC        | -4.299 | -0.054 | -3.552 | 0.134373      |
| H43  | HC        | -2.48  | -1.562 | -4.309 | 0.166027      |
| H44  | HC        | -1.191 | -4.091 | 4.297  | 0.095495      |
| H45  | HC        | -2.802 | -3.678 | 3.679  | 0.085857      |
| H46  | H3        | -2.239 | -1.399 | 3.784  | 0.108636      |



|     |    |        |        |        |          |
|-----|----|--------|--------|--------|----------|
| H47 | H3 | -0.684 | -1.714 | 4.171  | 0.130688 |
| H48 | HC | -1.326 | -2.658 | 6.282  | 0.1508   |
| H49 | HC | -3.014 | -2.392 | 5.822  | 0.113028 |
| H50 | HC | -2.368 | -0.69  | 7.349  | 0.047267 |
| H51 | HC | -2.63  | 0.07   | 5.78   | 0.108506 |
| H52 | HC | 0.157  | -0.764 | 6.696  | 0.163462 |
| H53 | HC | -0.581 | 0.739  | 7.267  | 0.111914 |
| H54 | H3 | -0.85  | 1.454  | 5.038  | 0.124064 |
| H55 | H3 | -0.179 | 0.09   | 4.446  | 0.116603 |
| H56 | HC | 1.261  | 1.958  | 6.188  | 0.091277 |
| H57 | HC | 1.22   | 2.057  | 4.432  | 0.122585 |
| H58 | HC | 2.106  | -0.409 | 4.425  | 0.123839 |
| H59 | HC | 2.408  | -0.15  | 6.148  | 0.084768 |
| H60 | HC | 4.449  | 0.349  | 5.095  | 0.084805 |
| H61 | HC | 3.736  | 1.927  | 5.468  | 0.146428 |
| H62 | H3 | 2.919  | 1.871  | 3.111  | 0.1199   |
| H63 | H3 | 3.844  | 0.548  | 2.866  | 0.137569 |
| H64 | HC | 5.784  | 1.813  | 3.695  | 0.15989  |
| H65 | HC | 4.757  | 3.249  | 3.586  | 0.120342 |
| H66 | HC | 5.423  | 1.376  | 1.249  | 0.044091 |
| H67 | HC | 6.333  | 2.809  | 1.683  | 0.097385 |
| H68 | HC | 4.998  | 3.434  | -0.104 | 0.160783 |
| H69 | HC | 4.317  | 4.24   | 1.314  | 0.12595  |
| H70 | H3 | 2.521  | 2.753  | 1.291  | 0.114203 |
| H71 | H3 | 3.25   | 1.716  | 0.262  | 0.140297 |
| H72 | HC | 3.088  | 3.121  | -1.552 | 0.11756  |
| H73 | HC | 2.587  | 4.473  | -0.526 | 0.067235 |
| H74 | HC | 0.927  | 1.94   | -0.739 | 0.110313 |
| H75 | HC | 0.831  | 3.232  | -1.944 | 0.146602 |
| H76 | HC | 0.265  | 4.859  | -0.096 | 0.168704 |
| H77 | HC | 0.259  | 3.511  | 1.038  | 0.116614 |
| H78 | H3 | -1.895 | 3.915  | 0.418  | 0.05066  |
| H79 | H3 | -1.489 | 2.512  | -0.317 | 0.102619 |
| H80 | HC | -1.354 | 3.555  | -2.439 | 0.137401 |
| H81 | HC | -1.493 | 5.128  | -1.643 | 0.161036 |
| H82 | HC | -3.57  | 4.672  | -2.625 | 0.148402 |
| H83 | HC | -3.811 | 4.522  | -0.884 | 0.088235 |
| H84 | HC | -3.195 | 2.076  | -2.567 | 0.060139 |
| H85 | HC | -4.818 | 2.777  | -2.618 | 0.139681 |
| H86 | H3 | -4.977 | 2.547  | -0.28  | 0.118718 |
| H87 | H3 | -3.494 | 1.87   | -0.172 | 0.085527 |
| H88 | HC | -5.75  | 0.693  | -1.646 | 0.151289 |
| H89 | HC | -5.287 | 0.293  | 0.014  | 0.104764 |
| P90 | P  | 2.332  | -1.041 | 0.792  | 2.087527 |
| O91 | O2 | 3.412  | -0.05  | 1.023  | -1.08131 |
| O92 | O2 | 2.386  | -2.223 | 1.681  | -1.07089 |
| O93 | OS | 2.72   | -1.662 | -0.645 | -0.63096 |
| C94 | CT | 3.338  | -0.872 | -1.644 | 0.142772 |
| H95 | HC | 2.843  | 0.096  | -1.728 | -0.0179  |
| H96 | HC | 4.379  | -0.713 | -1.364 | 0.050401 |
| C97 | CT | 3.279  | -1.597 | -2.993 | -0.01572 |
| H98 | HC | 3.677  | -2.606 | -2.874 | 0.038706 |

|      |    |        |        |        |          |
|------|----|--------|--------|--------|----------|
| O99  | OS | 1.929  | -1.642 | -3.437 | -0.26788 |
| C100 | CT | 1.821  | -0.955 | -4.673 | 0.095785 |
| H101 | HC | 1.978  | -1.702 | -5.454 | 0.047496 |
| N102 | N* | 0.515  | -0.27  | -4.889 | 0.088225 |
| C103 | CM | -0.119 | -0.371 | -6.106 | -0.16253 |
| H104 | HC | 0.301  | -1.007 | -6.872 | 0.18304  |
| C105 | CM | -1.251 | 0.321  | -6.38  | -0.26524 |
| H106 | HC | -1.719 | 0.218  | -7.349 | 0.134639 |
| C107 | CA | -1.762 | 1.176  | -5.342 | -0.02526 |
| N108 | N2 | -2.874 | 1.894  | -5.549 | 0.073909 |
| H109 | H2 | -3.355 | 1.837  | -6.436 | 0.038961 |
| H110 | H2 | -3.233 | 2.492  | -4.818 | 0.023416 |
| N111 | NC | -1.143 | 1.265  | -4.153 | -0.40809 |
| C112 | C  | -0.011 | 0.552  | -3.885 | 0.292746 |
| O113 | O  | 0.524  | 0.638  | -2.784 | -0.53392 |
| C114 | CT | 4.075  | -0.832 | -4.057 | 0.033716 |
| H115 | HC | 4.879  | -0.224 | -3.639 | 0.166244 |
| C116 | CT | 2.995  | 0.021  | -4.706 | 0.025158 |
| H117 | HC | 2.797  | 0.899  | -4.091 | 0.070469 |
| O118 | OH | 3.346  | 0.406  | -6.019 | -0.38432 |
| H119 | HO | 2.608  | 0.885  | -6.404 | 0.221    |
| O120 | OH | 4.599  | -1.738 | -5.006 | -0.38209 |
| O121 | O2 | 0.983  | -0.475 | 0.533  | -0.90619 |
| P122 | P  | 0.385  | 0.266  | 1.674  | 2.100363 |
| O123 | O2 | 0.221  | -0.636 | 2.841  | -1.03725 |
| O124 | O2 | 1.272  | 1.397  | 2.055  | -1.11025 |
| O125 | O2 | -0.934 | 0.799  | 1.232  | -0.8869  |
| P126 | P  | -1.851 | 1.364  | 2.261  | 2.042111 |
| O127 | O2 | -2.437 | 0.286  | 3.088  | -1.07525 |
| O128 | O2 | -1.151 | 2.327  | 3.141  | -0.95794 |
| O129 | O2 | -2.94  | 2.081  | 1.562  | -1.03394 |
| H130 | HO | 4.818  | -1.241 | -5.799 | 0.297155 |

**Table S10.** Atomic coordinates and atomic charge of the lowest energy conformer of the adducts between  $[\text{H}_6\text{L}]^{6+}$  and CTP in the B family

| Atom | Atom type | X      | Y      | Z      | Atomic charge |
|------|-----------|--------|--------|--------|---------------|
| C1   | CA        | -3.668 | 1.422  | -1.725 | -0.1328       |
| C2   | CA        | -2.397 | 1.988  | -1.509 | -0.17513      |
| N3   | NC        | -1.325 | 1.498  | -2.163 | 0.01778       |
| C4   | CA        | -1.405 | 0.463  | -3.02  | -0.03796      |
| C5   | CA        | -2.655 | -0.142 | -3.275 | -0.02075      |
| C6   | CA        | -3.8   | 0.35   | -2.623 | 0.015618      |
| C7   | CA        | -2.742 | -1.233 | -4.159 | -0.03675      |
| C8   | CA        | -1.585 | -1.719 | -4.792 | -0.02668      |
| C9   | CA        | -0.339 | -1.109 | -4.55  | -0.02637      |
| C10  | CA        | -0.249 | -0.009 | -3.67  | -0.04049      |
| N11  | NC        | 0.934  | 0.612  | -3.487 | 0.009749      |
| C12  | CA        | 2.059  | 0.222  | -4.115 | -0.16911      |
| C13  | CA        | 2.033  | -0.887 | -4.983 | -0.12625      |
| C14  | CA        | 0.823  | -1.568 | -5.194 | 0.011956      |
| C15  | CT        | -2.23  | 3.16   | -0.563 | -0.14554      |
| N16  | N3        | -0.83  | 3.224  | -0.097 | 0.577409      |
| C17  | CT        | -0.481 | 4.387  | 0.745  | -0.20284      |
| C18  | CT        | -1.214 | 4.41   | 2.093  | -0.11698      |
| C19  | CT        | -1.092 | 3.099  | 2.88   | -0.20093      |
| N20  | N3        | 0.306  | 2.748  | 3.202  | 0.589054      |
| C21  | CT        | 0.404  | 1.495  | 3.972  | -0.20577      |
| C22  | CT        | 1.853  | 1.143  | 4.32   | -0.12394      |
| C23  | CT        | 1.933  | -0.141 | 5.151  | -0.20394      |
| N24  | N3        | 1.259  | -1.284 | 4.496  | 0.589252      |
| C25  | CT        | 1.447  | -2.565 | 5.208  | -0.2095       |
| C26  | CT        | 2.824  | -3.208 | 4.989  | -0.11103      |
| C27  | CT        | 3.073  | -3.637 | 3.532  | -0.20351      |
| N28  | N3        | 3.641  | -2.576 | 2.673  | 0.585195      |
| C29  | CT        | 4.969  | -2.072 | 3.089  | -0.21388      |
| C30  | CT        | 5.788  | -1.532 | 1.909  | -0.13443      |
| C31  | CT        | 5.053  | -0.402 | 1.178  | -0.20519      |
| N32  | N3        | 5.819  | 0.171  | 0.053  | 0.572408      |
| C33  | CT        | 6.168  | -0.799 | -1.006 | -0.19482      |
| C34  | CT        | 6.646  | -0.122 | -2.298 | -0.13888      |
| C35  | CT        | 5.613  | 0.814  | -2.943 | -0.21261      |
| N36  | N3        | 4.314  | 0.152  | -3.183 | 0.580888      |
| C37  | CT        | 3.342  | 0.996  | -3.898 | -0.1467       |
| H38  | HC        | -4.536 | 1.807  | -1.211 | 0.123905      |
| H39  | HC        | -4.769 | -0.097 | -2.79  | 0.164819      |
| H40  | HC        | -3.692 | -1.713 | -4.346 | 0.159174      |
| H41  | HC        | -1.661 | -2.561 | -5.466 | 0.159246      |
| H42  | HC        | 2.929  | -1.212 | -5.49  | 0.134373      |
| H43  | HC        | 0.79   | -2.414 | -5.865 | 0.166027      |
| H44  | HC        | -2.898 | 3.034  | 0.288  | 0.095495      |
| H45  | HC        | -2.483 | 4.079  | -1.092 | 0.085857      |
| H46  | H3        | -0.228 | 3.248  | -0.91  | 0.108636      |

|     |    |        |        |        |          |
|-----|----|--------|--------|--------|----------|
| H47 | H3 | -0.614 | 2.369  | 0.4    | 0.130688 |
| H48 | HC | -0.708 | 5.303  | 0.198  | 0.1508   |
| H49 | HC | 0.594  | 4.366  | 0.924  | 0.113028 |
| H50 | HC | -2.272 | 4.613  | 1.922  | 0.047267 |
| H51 | HC | -0.81  | 5.226  | 2.694  | 0.108506 |
| H52 | HC | -1.535 | 2.286  | 2.308  | 0.163462 |
| H53 | HC | -1.651 | 3.208  | 3.81   | 0.111914 |
| H54 | H3 | 0.72   | 3.497  | 3.737  | 0.124064 |
| H55 | H3 | 0.828  | 2.634  | 2.343  | 0.116603 |
| H56 | HC | -0.025 | 0.704  | 3.359  | 0.091277 |
| H57 | HC | -0.167 | 1.595  | 4.895  | 0.122585 |
| H58 | HC | 2.297  | 1.96   | 4.891  | 0.123839 |
| H59 | HC | 2.434  | 1.008  | 3.409  | 0.084768 |
| H60 | HC | 1.465  | 0.034  | 6.121  | 0.084805 |
| H61 | HC | 2.986  | -0.369 | 5.311  | 0.146428 |
| H62 | H3 | 1.575  | -1.365 | 3.537  | 0.1199   |
| H63 | H3 | 0.267  | -1.088 | 4.475  | 0.137569 |
| H64 | HC | 0.692  | -3.274 | 4.874  | 0.15989  |
| H65 | HC | 1.291  | -2.405 | 6.276  | 0.120342 |
| H66 | HC | 2.833  | -4.118 | 5.592  | 0.044091 |
| H67 | HC | 3.624  | -2.57  | 5.362  | 0.097385 |
| H68 | HC | 2.141  | -3.986 | 3.083  | 0.160783 |
| H69 | HC | 3.773  | -4.473 | 3.533  | 0.12595  |
| H70 | H3 | 2.993  | -1.803 | 2.598  | 0.114203 |
| H71 | H3 | 3.725  | -2.974 | 1.745  | 0.140297 |
| H72 | HC | 5.542  | -2.885 | 3.536  | 0.11756  |
| H73 | HC | 4.843  | -1.284 | 3.832  | 0.067235 |
| H74 | HC | 5.974  | -2.359 | 1.223  | 0.110313 |
| H75 | HC | 6.744  | -1.161 | 2.282  | 0.146602 |
| H76 | HC | 4.815  | 0.401  | 1.877  | 0.168704 |
| H77 | HC | 4.128  | -0.801 | 0.775  | 0.116614 |
| H78 | H3 | 6.667  | 0.592  | 0.405  | 0.05066  |
| H79 | H3 | 5.245  | 0.899  | -0.353 | 0.102619 |
| H80 | HC | 5.309  | -1.431 | -1.227 | 0.137401 |
| H81 | HC | 6.974  | -1.439 | -0.646 | 0.161036 |
| H82 | HC | 6.901  | -0.903 | -3.016 | 0.148402 |
| H83 | HC | 7.55   | 0.451  | -2.085 | 0.088235 |
| H84 | HC | 6.017  | 1.147  | -3.9   | 0.060139 |
| H85 | HC | 5.468  | 1.695  | -2.319 | 0.139681 |
| H86 | H3 | 3.903  | -0.135 | -2.303 | 0.118718 |
| H87 | H3 | 4.477  | -0.678 | -3.735 | 0.085527 |
| H88 | HC | 3.749  | 1.294  | -4.865 | 0.151289 |
| H89 | HC | 3.137  | 1.892  | -3.31  | 0.104764 |
| P90 | P  | 1.934  | -2.336 | -0.849 | 2.087527 |
| O91 | O2 | 2.885  | -1.781 | -1.841 | -1.08131 |
| O92 | O2 | 2.584  | -3.078 | 0.258  | -1.07089 |
| O93 | OS | 1.222  | -3.508 | -1.703 | -0.63096 |
| C94 | CT | 0.478  | -4.561 | -1.109 | 0.142772 |
| H95 | HC | 0.316  | -5.303 | -1.892 | -0.0179  |
| H96 | HC | 1.045  | -5.039 | -0.309 | 0.050401 |
| C97 | CT | -0.905 | -4.143 | -0.594 | -0.01572 |
| H98 | HC | -1.466 | -5.053 | -0.374 | 0.038706 |

|      |    |        |        |        |          |
|------|----|--------|--------|--------|----------|
| O99  | OS | -0.862 | -3.399 | 0.605  | -0.26788 |
| C100 | CT | -2.148 | -2.824 | 0.749  | 0.095785 |
| H101 | HC | -2.854 | -3.624 | 0.98   | 0.047496 |
| N102 | N* | -2.233 | -1.802 | 1.838  | 0.088225 |
| C103 | CM | -2.977 | -0.649 | 1.693  | -0.16253 |
| H104 | HC | -3.43  | -0.404 | 0.747  | 0.18304  |
| C105 | CM | -3.192 | 0.198  | 2.728  | -0.26524 |
| H106 | HC | -3.793 | 1.083  | 2.574  | 0.134639 |
| C107 | CA | -2.606 | -0.15  | 3.993  | -0.02526 |
| N108 | N2 | -2.794 | 0.64   | 5.06   | 0.073909 |
| H109 | H2 | -3.34  | 1.485  | 4.973  | 0.038961 |
| H110 | H2 | -2.39  | 0.389  | 5.951  | 0.023416 |
| N111 | NC | -1.889 | -1.276 | 4.136  | -0.40809 |
| C112 | C  | -1.698 | -2.132 | 3.089  | 0.292746 |
| O113 | O  | -1.109 | -3.195 | 3.269  | -0.53392 |
| C114 | CT | -1.71  | -3.289 | -1.576 | 0.033716 |
| H115 | HC | -1.057 | -2.736 | -2.249 | 0.166244 |
| C116 | CT | -2.44  | -2.301 | -0.662 | 0.025158 |
| H117 | HC | -1.99  | -1.317 | -0.79  | 0.070469 |
| O118 | OH | -3.826 | -2.271 | -0.939 | -0.38432 |
| H119 | HO | -4.127 | -3.177 | -1.044 | 0.221    |
| O120 | OH | -2.604 | -4.098 | -2.315 | -0.38209 |
| O121 | O2 | 0.805  | -1.444 | -0.47  | -0.90619 |
| P122 | P  | 1.201  | -0.262 | 0.343  | 2.100363 |
| O123 | O2 | 0.01   | 0.608  | 0.515  | -1.03725 |
| O124 | O2 | 1.658  | -0.706 | 1.69   | -1.11025 |
| O125 | O2 | 2.305  | 0.466  | -0.348 | -0.8869  |
| P126 | P  | 2.525  | 1.916  | -0.125 | 2.042111 |
| O127 | O2 | 3.941  | 2.213  | -0.437 | -1.07525 |
| O128 | O2 | 1.657  | 2.7    | -1.031 | -0.95794 |
| O129 | O2 | 2.258  | 2.309  | 1.278  | -1.03394 |
| H130 | HO | -2.092 | -4.74  | -2.812 | 0.297155 |
